# Supplementary material for: Measuring Activity Levels at an Acute Stroke Ward: Comparing Observations to a Device
Source: Biomed Res Int. 2013 Oct 27;2013:460482. doi: 10.1155/2013/460482 (PMC3824838; doi:10.1155/2013/460482)
Supplement: Supplementary file 1 — The Supplementary Material contains plots of observations and the PAL2 data of three participants. The plots illustrate examples of disagreement between the observations and PAL2 readings and include the data of the outlier. [file 460482.f1.zip]

Archive with 18 entries (18 files):
- 460482.f1/627244.doc
- 460482.f1/630733.xls
- 460482.f1/630800.xls
- 460482.f1/630801.xls
- 460482.f1/630802.xls
- 460482.f1/630803.xls
- 460482.f1/630804.xls
- 460482.f1/630809.xls
- 460482.f1/630810.xls
- 460482.f1/630811.xls
- 460482.f1/630812.xls
- 460482.f1/630813.xls
- 460482.f1/643159.xls
- 460482.f1/643160.xls
- 460482.f1/643161.xls
- 460482.f1/643162.xls
- 460482.f1/643163.xls
- 460482.f1/643164.xls
